# Supplementary material for: Endothelial cell tropism is a determinant of H5N1 pathogenesis in mammalian species
Source: PubMed Central journal article supplement (PMC5362246; doi:10.1371/journal.ppat.1006270), 2017-03-10
Supplement: ppat.1006270.s001.pdf [file ppat.1006270.s001.pdf]

Supplementary Table 1: Conservation of miR-126-3p and miR-142-3p among different species

| <b>Conservation of miR-126-3p</b> |                               |                                   |
|-----------------------------------|-------------------------------|-----------------------------------|
| Human<br>NR_029695.1              | <b>ucguaccgugaguaauaaugcg</b> | hsa-miR-126-3p                    |
| Mouse<br>NR_029541.1              | <b>ucguaccgugaguaauaaugcg</b> | mmu-miR-126a-3p                   |
| Ferret Genome                     | <b>ucguaccgugaguaauaaugcg</b> | Putative miRNA<br>(not annotated) |
| Chicken<br>NR_031468              | <b>ucguaccgugaguaauaaugcg</b> | gga-miR-126-3p                    |

| <b>Conservation of miR-142-3p</b> |                                |                                   |
|-----------------------------------|--------------------------------|-----------------------------------|
| Human<br>NR_029683                | <b>uguaguguuuccuacuuuaugga</b> | hsa-miR-142-3p                    |
| Mouse<br>NR_029555.1              | <b>uguaguguuuccuacuuuaugga</b> | mmu-miR-142a-3p                   |
| Ferret Genome                     | <b>uguaguguuuccuacuuuaugga</b> | Putative miRNA<br>(not annotated) |
| Chicken<br>NR_031503.1            | <b>uguaguguuuccuacuuuaugga</b> | gga-miR-126-3p                    |
